# Supplementary material
Source: PubMed Central journal article supplement (PMC5563955)
Supplement: ismej201767x1.pdf [file ismej201767x1.pdf]

**Figure S1.** Map showing the location and distribution of sites across the sampled region. The inset map indicates the position of La Côte-Nord region in North America, and the shaded area represents the boreal zone. Colour indicates lakes (dark blue), rivers (Strahler order >2, blue), streams (Strahler order  $\leq 2$ , light grey, orange –if the adjacent soil and soil water were also sampled-, and green –if in addition to soils, tree leaves were collected-). The arrows indicate the 3 samples that were further subjected to the deep sequencing.

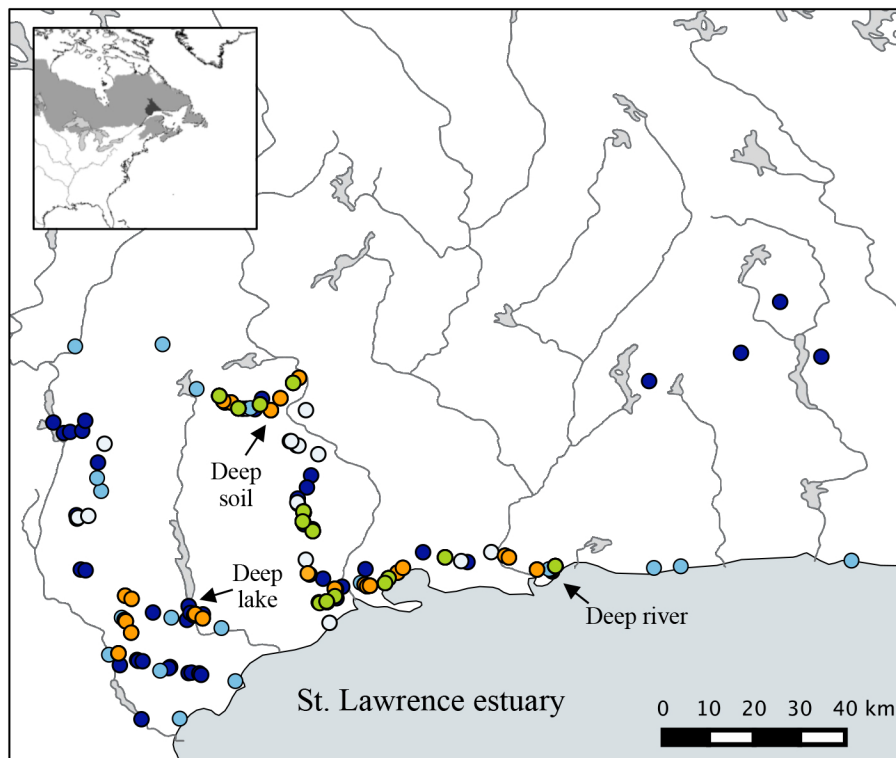

**Figure S2.** OTU accumulation curves of the 3 individual deeply sequenced samples.

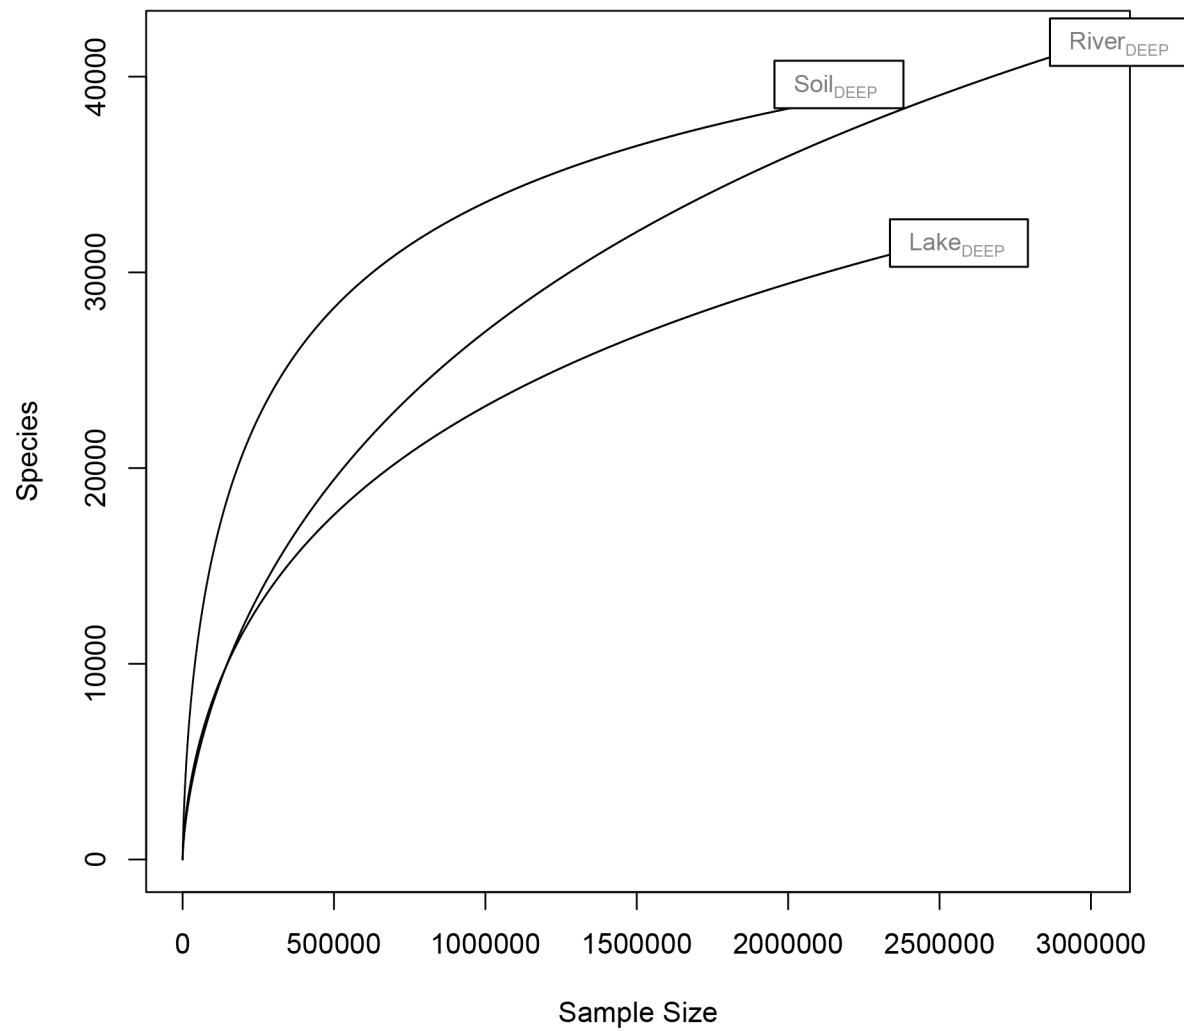

**Figure S3.** Non-metric multidimensional scaling (NMDS) plots based on Bray–Curtis distances of taxonomic composition of bacterial communities considering only those taxa belonging to the reactive pool (a,b) or the non-reactive pool (c,d) depending on whether they were detected (A,C) or not (B,D) in the 3 deeply sequenced samples.

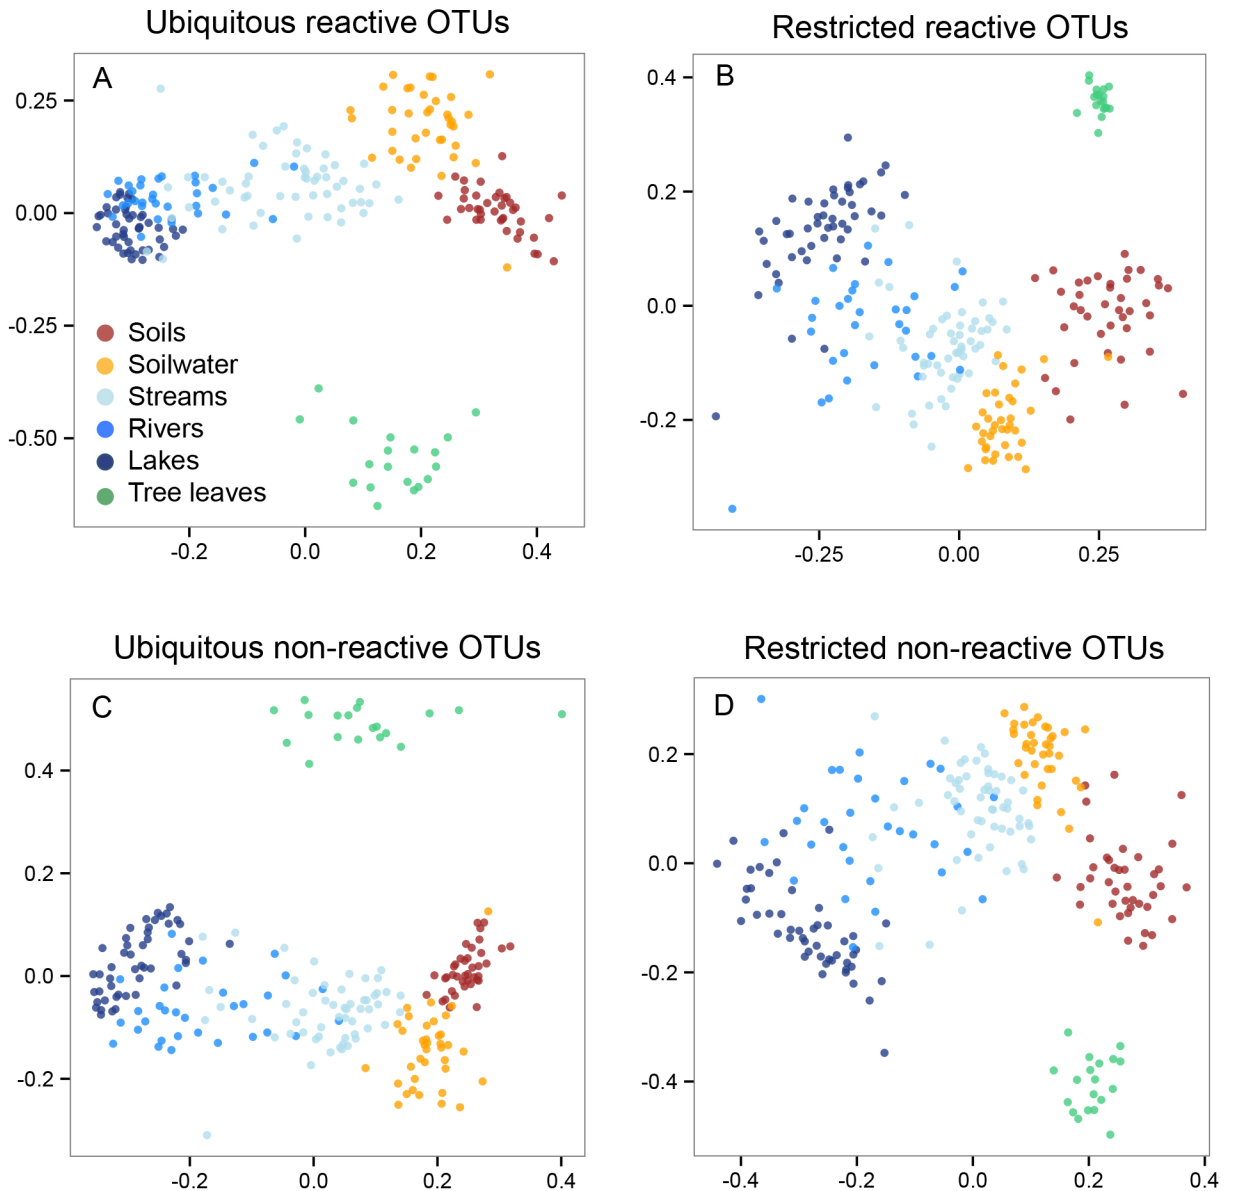

**Figure S4.** Contribution of some of the most abundant identified genera to the ‘ubiquitous reactive’ pool across the different types of ecosystems. Percentages were calculated with respect to the total sequences associated to the ‘ubiquitous reactive’ OTUs present at each site.

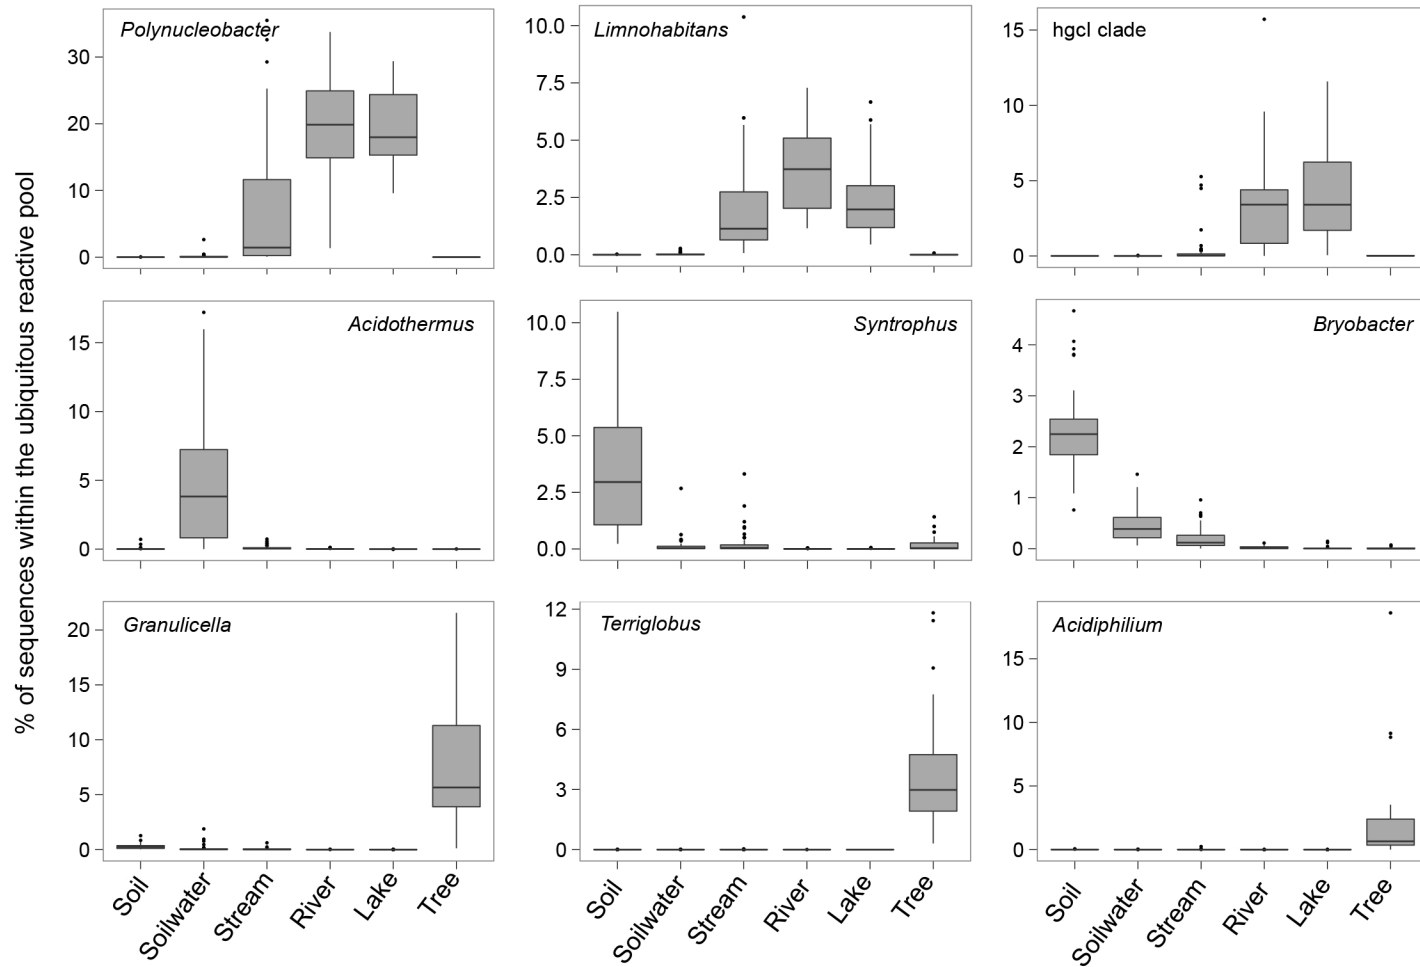

**Table S1.** Mean (and range) of the measured environmental parameters per type of ecosystem.

|                                        | Soils            | Soil water        | Streams           | Rivers            | Lakes             |
|----------------------------------------|------------------|-------------------|-------------------|-------------------|-------------------|
| Temperature (°C)                       | 14.8 (10.4-21.0) | 15.3 (11.1-22.7)  | 13.9 (6.2-25.3)   | 17.3 (10.5-24.2)  | 16.2 (10.7-24.8)  |
| pH                                     | 5.0 (3.8-6.1)    | 6.0 (5.1-7.2)     | 6.2 (4.5-7.9)     | 6.5 (4.9-7.4)     | 6.0 (4.8-7.0)     |
| DO (%)                                 | -                | 60.7 (22.8-101.1) | 87.7 (50.2-117.4) | 95.6 (63.7-117.4) | 98.7 (83.5-129.9) |
| Conductivity ( $\mu\text{S cm}^{-1}$ ) | -                | 346 (4-5386)      | 35.2 (10-201)     | 25.2 (8.0-73)     | 14.6 (6-28)       |
| DOC ( $\text{mg L}^{-1}$ )             | -                | 16.9 (3.6-64.7)   | 11.9 (1.8-57.2)   | 8.5 (3.6-24.4)    | 8.3 (3.2-13.1)    |
| cDOM ( $a_{440}, \text{m}^{-1}$ )      | -                | 16.9 (1.4-69.7)   | 9.6 (0.5-58.8)    | 6.13 (1.7-23.0)   | 4.4 (0.9-9.8)     |
| Organic matter content (%)             | 15.2 (0.5-92.9)  | -                 | -                 | -                 | -                 |
| Water content (%)                      | 34.4 (6.2-87.9)  | -                 | -                 | -                 | -                 |

**Table S2.** Criteria used for categorizing OTUs within the different pools of taxa, and number of total OTUs and associated sequences represented by each pool.

|                         | Selection criteria                              | Number of total OTUs | Number of total sequences |
|-------------------------|-------------------------------------------------|----------------------|---------------------------|
| Reactive OTUs           | > 0.01% local relative abundance at least once* | 34164                | 7191744                   |
| Ubiquitous reactive     | *and presence in any of the 3 deep samples      | 20969                | 6152190                   |
| Restricted reactive     | *and absence in all 3 deep samples              | 13195                | 1039554                   |
| Non-reactive OTUs       | < 0.01% local relative abundance always**       | 121673               | 849133                    |
| Ubiquitous non-reactive | **and presence in any of the 3 deep samples     | 55260                | 477243                    |
| Restricted non-reactive | **and absence in all 3 deep samples             | 66413                | 371890                    |

**Table S3.** Number of OTUs considered for each of the 3 comparisons shown in Figure 4. Note that despite very different number of OTUs considered, the percentage of recovered reactive OTUs does not change (Fig. 4A), suggesting that these patterns are not influenced by differences in the distribution of OTUs among samples.

| Number of OTUs in<br>deeply sequenced samples |     | Number of reactive OTUs in<br>shallowly sequenced samples |
|-----------------------------------------------|-----|-----------------------------------------------------------|
| 1 Soil                                        | vs. | 72 lakes and rivers                                       |
| 38842                                         |     | 9145                                                      |
| 1 Lake + 1 River                              | vs. | 78 soils and soilwaters                                   |
| 58408                                         |     | 19480                                                     |
| 1 Soil + 1 Lake + 1 River                     | vs. | 20 phyllosphere samples                                   |
| 89492                                         |     | 2311                                                      |
